# Supplementary material for: Discovery of a new type of organic ferroelectric materials in natural biomass dehydroabietylamine Schiff bases
Source: Royal Society of Chemistry journal article supplement (doi:10.1039/c0jm03461d), 2011-01-01
Supplement: c0jm03461d.pdf [file c0jm03461d.pdf]

## Supporting Information

### Discovery of New Type of Organic Ferroelectric Materials in Natural Biomass Dehydroabietylamine Schiff Bases

Yan Sui<sup>a,b,\*</sup> Dong-Sheng Liu<sup>a,b</sup> Rong-Hua Hu<sup>a</sup> and Hong-Mei Chen<sup>a</sup>

*a.* School of Chemistry and Chemical Engineering, the Key laboratory of Coordination Chemistry of Jiangxi Province, Jingtangshan University, Jiangxi, 343009, P. R. China; *b.* School of Chemistry and Chemical Engineering, Nanjing National Laboratory of Microstructures Nanjing University, Nanjing 210093, P. R. China E-mail: ysui@163.com (Y. Sui)

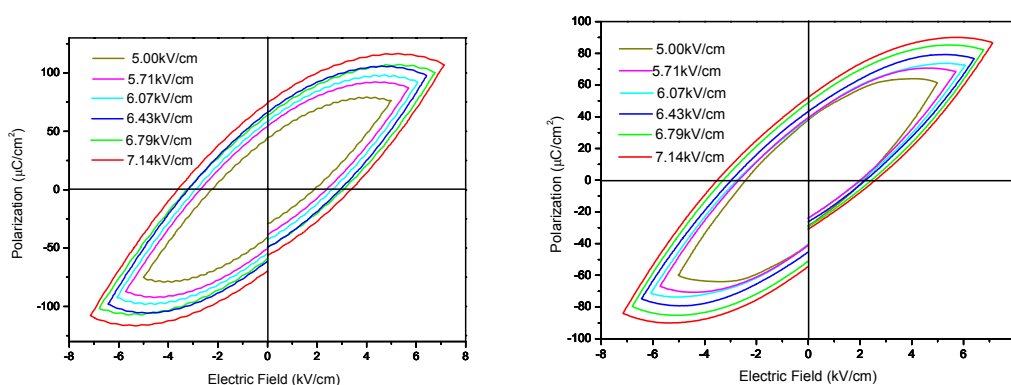

**Fig.S1** Electric hysteresis loops of CIDHA (left) and NODHA (right) recorded on a Ferroelectric Tester Precision Premier II made by Radiant Technologies, Inc., at r.t. for single crystal samples along *b* axis at different setting electric field.

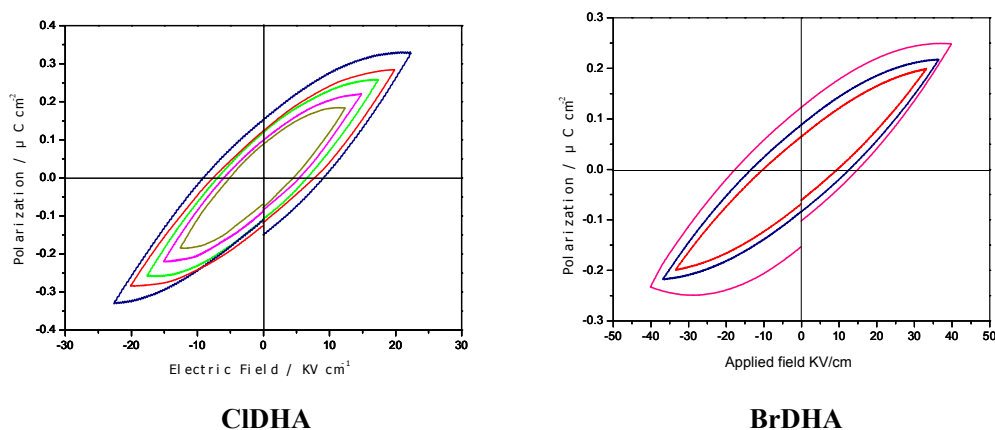

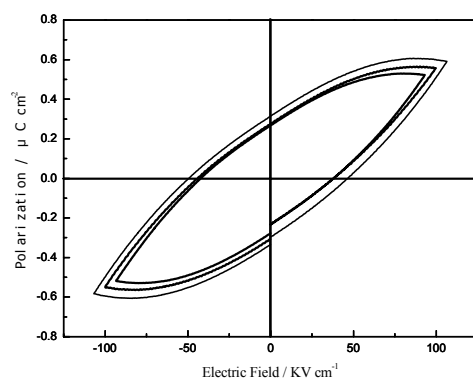

### NODHA

**Fig. S2** Electric hysteresis loops recorded on a Ferroelectric Tester Precision Premier II made by Radiant Technologies, Inc., at r.t. for powdered samples

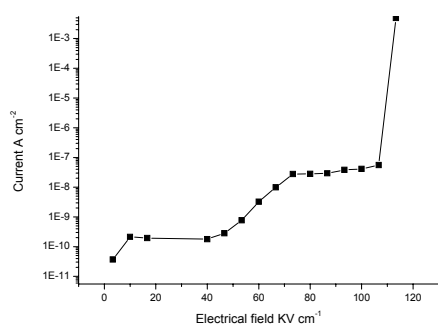

### CIDHA

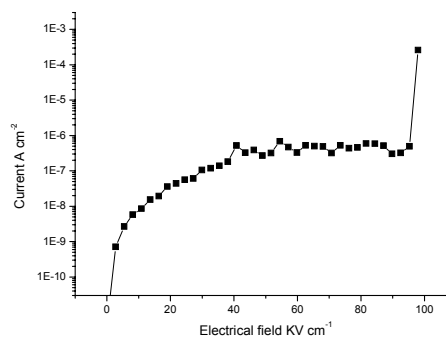

### BrDHA

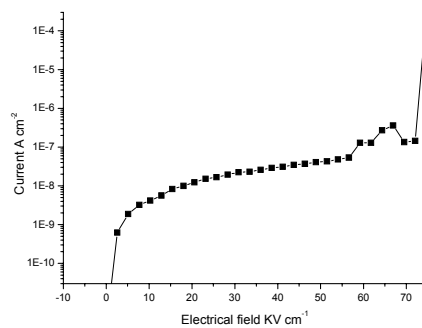

### NODHA

**Fig. S3** The leakage currents of powdered samples

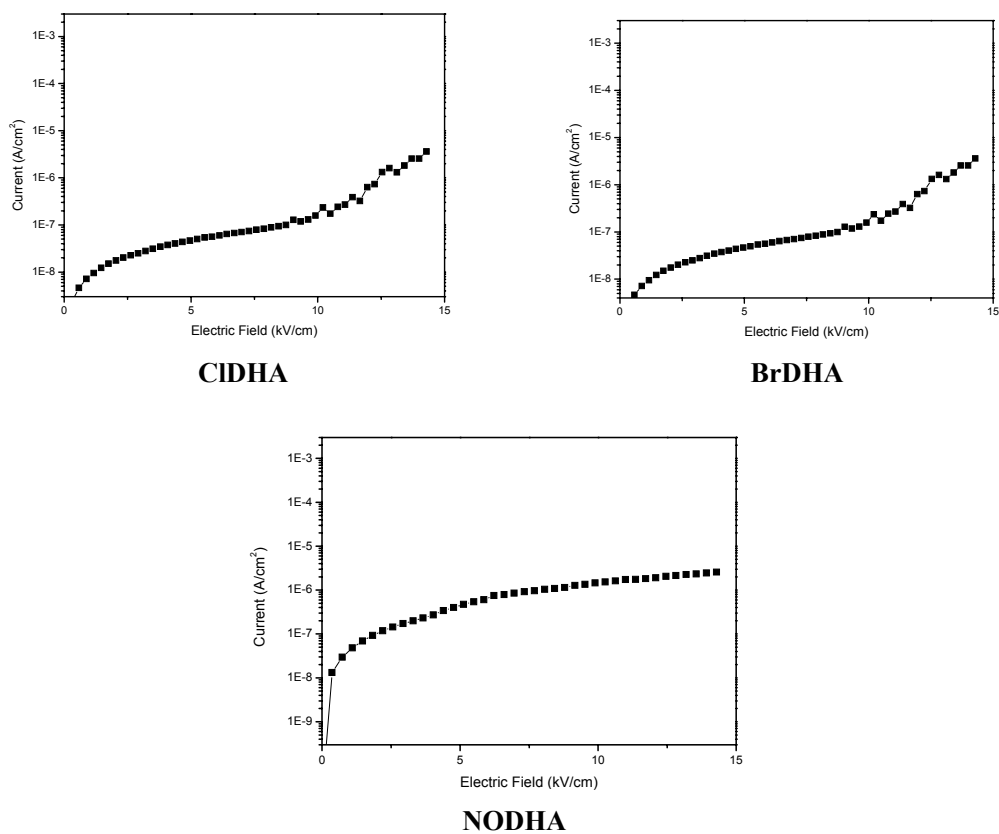

Fig. S4 The leakage currents of single crystal samples

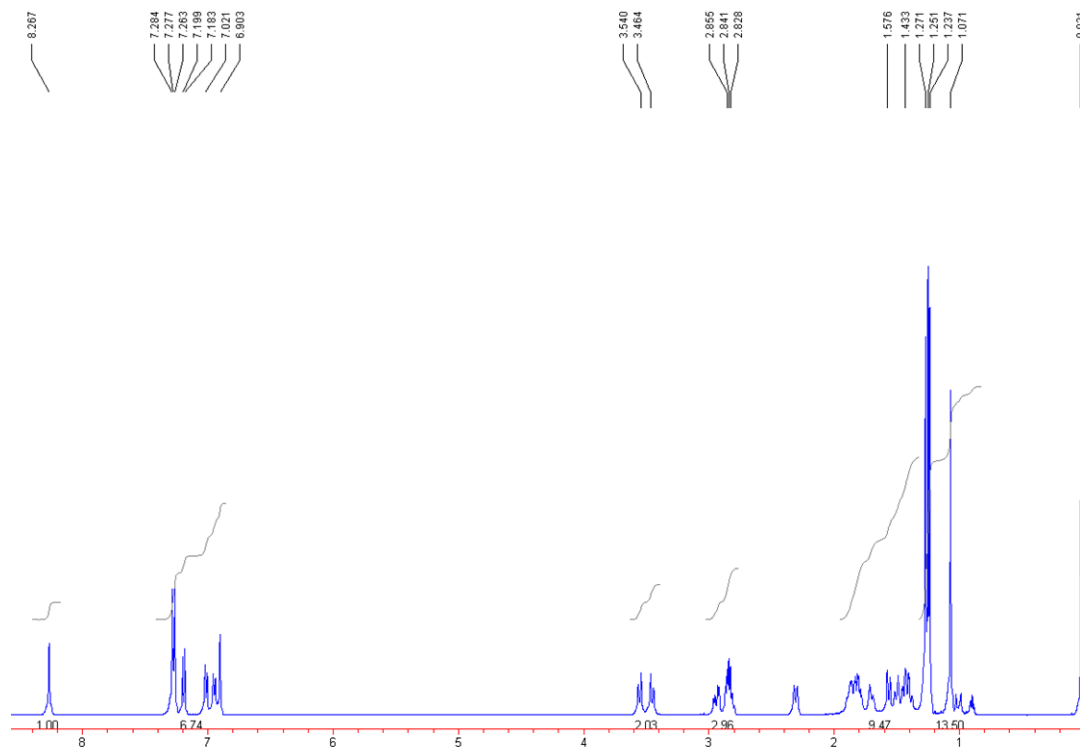

Fig. S5 <sup>1</sup>H NMR of CIDHA

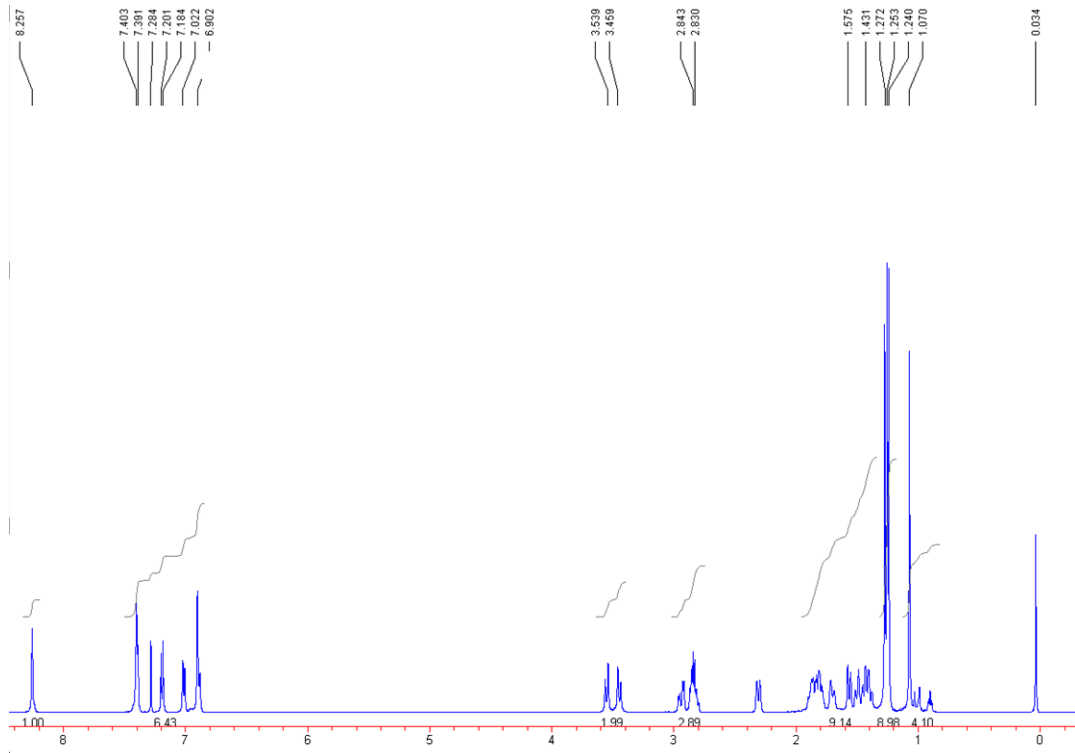

Fig. S6  $^1\text{H}$  NMR of BrDHA

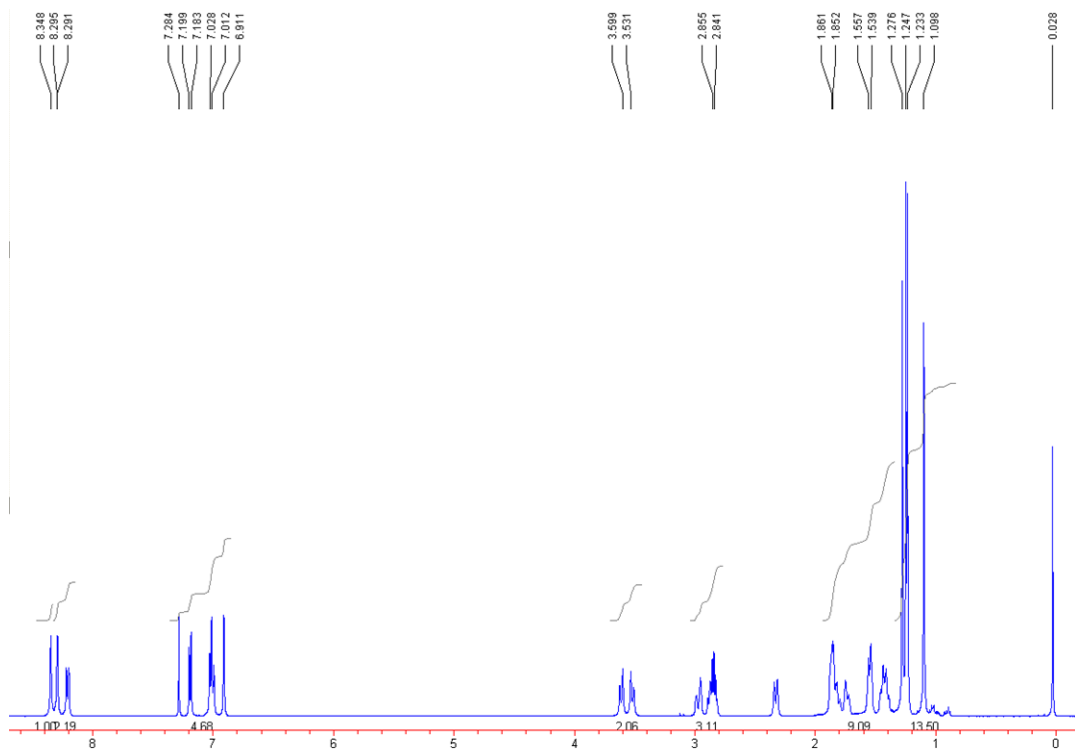

Fig. S7  $^1\text{H}$  NMR of NODHA
